# Supplementary material for: Ionic liquids enable the preparation of a copper-loaded gel with transdermal delivery function for wound dressings
Source: Royal Society of Chemistry journal article supplement (doi:10.1039/d1bm01745d), 2021-12-29
Supplement: d1bm01745d1.pdf [file d1bm01745d1.pdf]

**Ionic liquid enables the preparation of copper-loaded gel with transdermal  
delivery function for wound dressings**

Yi-Ru Gao<sup>1</sup>, Wen-Xin Zhang<sup>1</sup>, Ya-Nan Wei<sup>1</sup>, You Li<sup>2</sup>, Teng Fei<sup>2</sup>, Yang Shu<sup>1\*</sup>, Jian-  
Hua Wang<sup>1\*</sup>

1 Department of Chemistry, College of Sciences, Northeastern University, Shenyang  
110819, China

2 College of Life and Health Sciences, Northeastern University, Shenyang 110819,  
China

\*Corresponding author

E-mail: shuyang@mail.neu.edu.cn (Y. Shu), jianhuajrz@mail.neu.edu.cn (J.H.  
Wang).

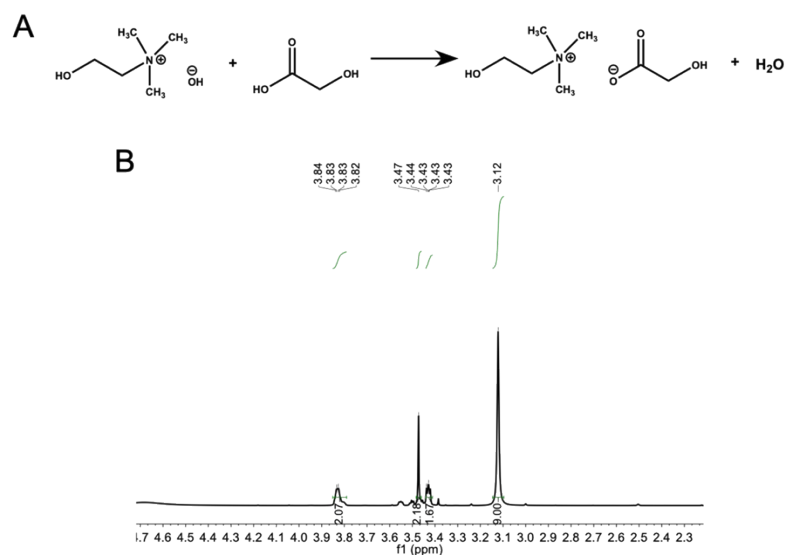

**Figure S1.** (A) The reaction process for the preparation of the ionic liquid moiety (CGLY). (B)  $^1\text{H}$  NMR spectrum of the prepared IL (CGLY).

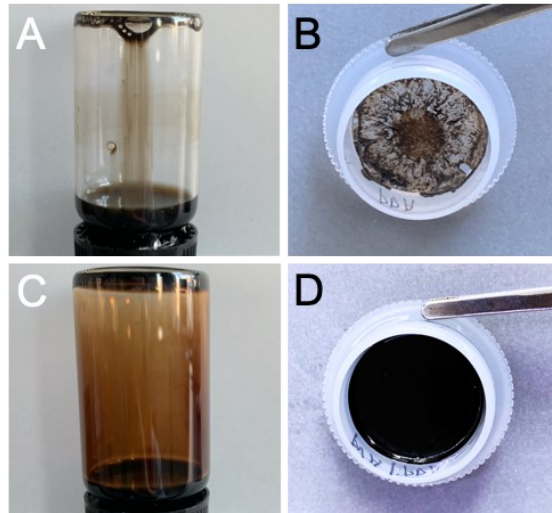

**Figure S2.** Comparison of the achieved PDA after self-polymerization and in situ polymerization. (A) The photograph of dopamine (DA) solution after the self-polymerization. (B) Self-polymerization of PDA solution drying in a petri dish. (C) The photograph of PVA/PDA solution after in situ polymerization. (D) In situ polymerization of PVA/PDA solution drying in a petri dish.

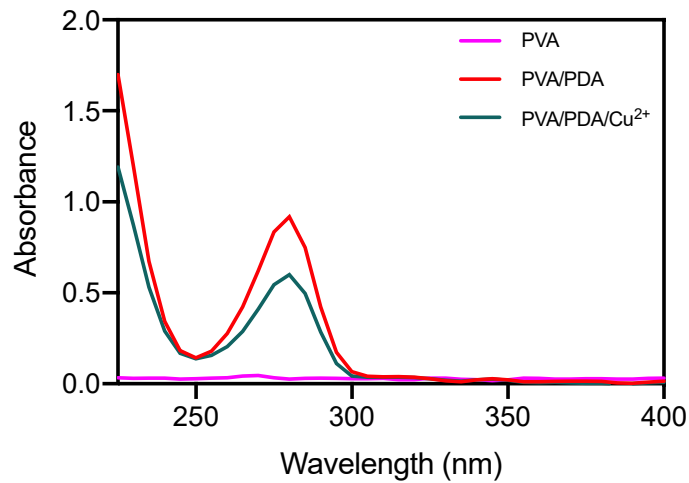

**Figure S3.** UV-vis absorption spectra of the PVA, PVA/PDA, and PVA/PDA/Cu<sup>2+</sup> solution. Compared to the PVA/PDA solution, the decrement on the absorption at 270 nm for PVA/PDA/Cu<sup>2+</sup> illustrated the formation of ionic coordination.

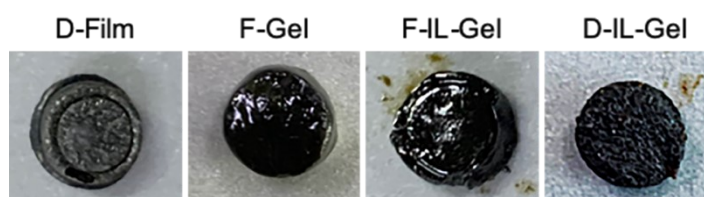

**Figure S4.** The photographs of the four kinds of gels.

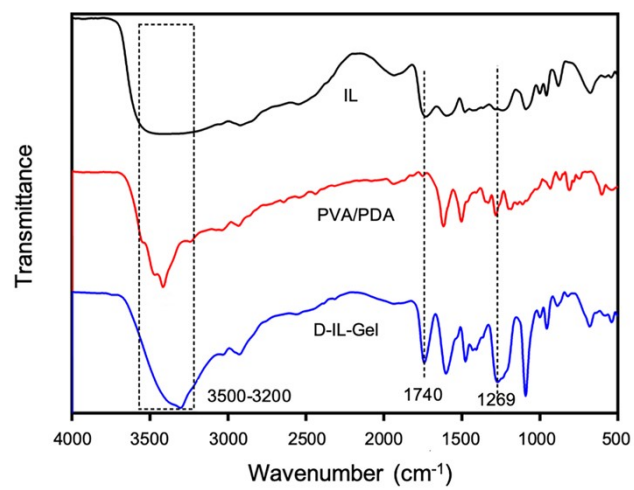

**Figure S5.** FT-IR spectrum of the IL (CGLY), copolymers and the obtained D-IL-Gel.

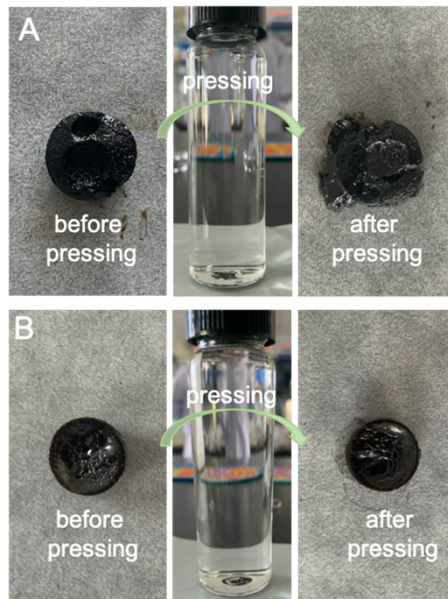

**Figure S6.** Photographs of (A) F-IL-Gel and (B) D-IL-Gel before and after pressing.

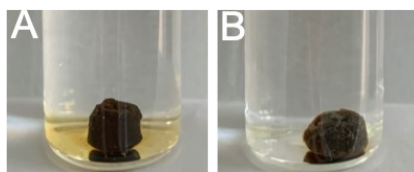

**Figure S7.** Photographs of (A) F-IL-Gel and (B) D-IL-Gel in water.



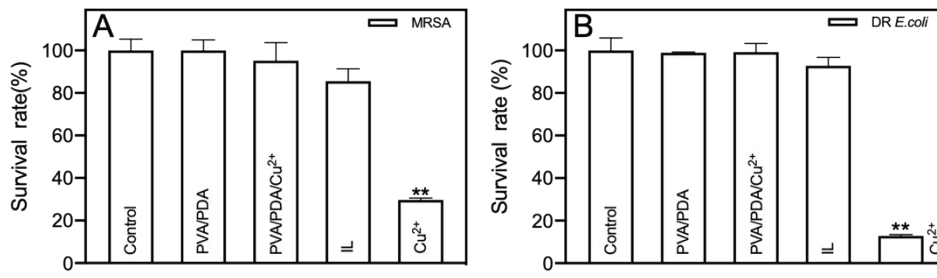

**Figure S8.** The survival rate of Gram-positive methicillin-resistant *staphylococcus aureus* (MRSA) (A) and drug-resistant Gram-negative *Escherichia coli* (DR-*E. coli*) (B) after treated with control, PVA/PDA, PVA/PDA/Cu<sup>2+</sup>, IL (CGLY) or Cu<sup>2+</sup>. The data are expressed as mean  $\pm$  SD of three independent experiments, \*\* $p < 0.01$ .

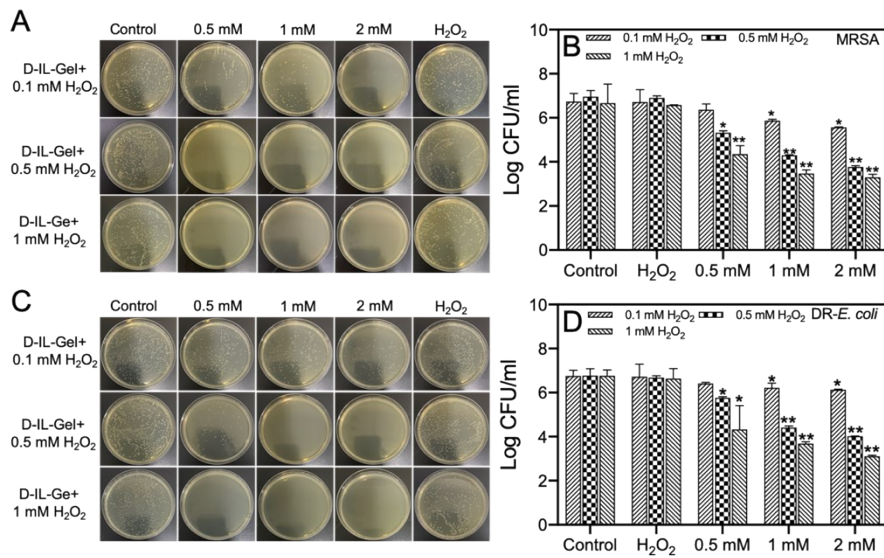

**Figure S9.** (A) Images of bacterial colonies formed by MRSA treated with (0.5-2 mM) D-IL-Gel and (0.1-1 mM) H<sub>2</sub>O<sub>2</sub>. (B) CFU analysis of MRSA with above mentioned treatments. (C) Images of bacterial colonies formed by DR-*E. coli* treated with (0.5-2 mM) D-IL-Gel and (0.1-1 mM) H<sub>2</sub>O<sub>2</sub>. (D) CFU analysis of DR-*E. coli* with above mentioned treatments. The data were expressed as mean  $\pm$  SD of three independent experiments, \* $p$ <0.05, \*\* $p$ <0.01.
